# Supplementary material for: Synthesis and characterization of a series of transition metal oxychlorides: MBi(SeO3)2(H2O)Cl (M = Co, Ni, Cu)
Source: Royal Society of Chemistry journal article supplement (doi:10.1039/c8dt02354a), 2018-01-01
Supplement: c8dt02354a1.pdf [file c8dt02354a1.pdf]

## Synthesis and characterization of a series of transition metal oxychlorides: $\text{MBi}(\text{SeO}_3)_2(\text{H}_2\text{O})\text{Cl}$ (M = Co, Ni, Cu)

Lei Geng,<sup>\*a</sup> Hao Wang,<sup>a</sup> Qiang Li,<sup>a</sup> Hong-Yan Lu<sup>a</sup> and Guo-Bao Li<sup>b</sup>

<sup>a</sup> College of Physics and Electronic Information, Huaibei Normal University, Huaibei, Anhui 235000, China

<sup>b</sup> College of Chemistry and Molecular Engineering, Peking University, Beijing 100871, China

### Electronic Supplementary Information

**Table S1.** Some selected important bond lengths (Å), bond valences and bond valence sums (BVS) for  $\text{MBi}(\text{SeO}_3)_2(\text{H}_2\text{O})\text{Cl}$  (M = Co, Ni, Cu).

| atoms                                                      | bond length | bond valence | atoms         | bond length | bond valence |
|------------------------------------------------------------|-------------|--------------|---------------|-------------|--------------|
| <b>CoBi(SeO<sub>3</sub>)<sub>2</sub>(H<sub>2</sub>O)Cl</b> |             |              |               |             |              |
| Bi(1)-O(5)#1                                               | 2.232(2)    | 0.689        |               |             | BVS= 4.0     |
| Bi(1)-O(6)                                                 | 2.275(2)    | 0.614        | Se(2)-O(2)    | 1.6920(19)  | 1.379        |
| Bi(1)-O(4)                                                 | 2.364(2)    | 0.482        | Se(2)-O(6)    | 1.703(2)    | 1.337        |
| Bi(1)-O(1)                                                 | 2.411(2)    | 0.424        | Se(2)-O(4)#2  | 1.719(2)    | 1.283        |
| Bi(1)-O(4)#2                                               | 2.582(2)    | 0.268        |               |             | BVS= 4.0     |
| Bi(1)-O(3)                                                 | 2.617(2)    | 0.243        | Co(1)-O(7)    | 2.053(2)    | 0.377        |
| Bi(1)-Cl(1)                                                | 2.9686(7)   | 0.267        | Co(1)-O(3)#3  | 2.065(2)    | 0.365        |
| Bi(1)-Cl(1)#8                                              | 3.2832(8)   | 0.114        | Co(1)-O(1)    | 2.071(2)    | 0.359        |
|                                                            |             | BVS= 3.1     | Co(1)-O(2)#4  | 2.0741(19)  | 0.356        |
| Se(1)-O(3)                                                 | 1.685(2)    | 1.404        | Co(1)-O(2)    | 2.143(2)    | 0.296        |
| Se(1)-O(5)                                                 | 1.713(2)    | 1.305        | Co(1)-Cl(1)#3 | 2.5538(8)   | 0.245        |
| Se(1)-O(1)                                                 | 1.717(2)    | 1.288        |               |             | BVS= 2.0     |
| <b>NiBi(SeO<sub>3</sub>)<sub>2</sub>(H<sub>2</sub>O)Cl</b> |             |              |               |             |              |
| Bi(1)-O(6)                                                 | 2.225(2)    | 0.701        |               |             | BVS= 4.0     |
| Bi(1)-O(4)                                                 | 2.267(2)    | 0.627        | Se(2)-O(5)    | 1.688(2)    | 1.396        |
| Bi(1)-O(3)#1                                               | 2.358(2)    | 0.490        | Se(2)-O(6)#1  | 1.714(2)    | 1.300        |
| Bi(1)-O(1)                                                 | 2.404(2)    | 0.433        | Se(2)-O(1)    | 1.715(2)    | 1.297        |
| Bi(1)-O(3)                                                 | 2.589(2)    | 0.263        |               |             | BVS= 4.0     |
| Bi(1)-O(5)                                                 | 2.607(2)    | 0.250        | Ni(1)-O(7)    | 2.022(2)    | 0.369        |
| Bi(1)-Cl(1)                                                | 2.9731(8)   | 0.264        | Ni(1)-O(5)#1  | 2.039(2)    | 0.353        |
| Bi(1)-Cl(1)#8                                              | 3.3341(8)   | 0.099        | Ni(1)-O(1)    | 2.057(2)    | 0.337        |
|                                                            |             | BVS= 3.1     | Ni(1)-O(2)#6  | 2.060(2)    | 0.334        |
| Se(1)-O(2)                                                 | 1.694(2)    | 1.372        | Ni(1)-O(2)    | 2.088(2)    | 0.309        |
| Se(1)-O(4)                                                 | 1.706(2)    | 1.329        | Ni(1)-Cl(1)#1 | 2.4848(9)   | 0.285        |
| Se(1)-O(3)                                                 | 1.719(2)    | 1.281        |               |             | BVS= 2.0     |
| <b>CuBi(SeO<sub>3</sub>)<sub>2</sub>(H<sub>2</sub>O)Cl</b> |             |              |               |             |              |

|               |            |       |               |                |
|---------------|------------|-------|---------------|----------------|
| Bi(1)-O(5)    | 2.275(4)   | 0.613 |               | BVS= 4.0       |
| Bi(1)-O(6)    | 2.288(4)   | 0.592 | Se(2)-O(2)    | 1.693(4) 1.378 |
| Bi(1)-O(4)#1  | 2.310(4)   | 0.559 | Se(2)-O(5)#1  | 1.711(4) 1.311 |
| Bi(1)-O(3)    | 2.510(4)   | 0.325 | Se(2)-O(3)    | 1.714(3) 1.300 |
| Bi(1)-O(4)    | 2.601(4)   | 0.254 |               | BVS= 4.0       |
| Bi(1)-O(2)    | 2.696(4)   | 0.196 | Cu(1)-O(7)    | 1.958(4)       |
| Bi(1)-Cl(1)#1 | 2.8908(13) | 0.329 | Cu(1)-O(2)#7  | 1.971(3)       |
| Bi(1)-Cl(1)   | 3.0613(13) | 0.208 | Cu(1)-O(1)    | 1.971(3)       |
|               | BVS= 3.1   |       | Cu(1)-O(3)#8  | 1.987(3)       |
| Se(1)-O(1)    | 1.688(3)   | 1.394 | Cu(1)-O(1)#8  | 2.394(4)       |
| Se(1)-O(6)    | 1.708(4)   | 1.322 | Cu(1)-Cl(1)#8 | 2.776(2)       |
| Se(1)-O(4)    | 1.725(4)   | 1.259 |               | BVS= 2.1       |

Symmetry transformations used to generate equivalent atoms: #1  $-x, y-1/2, -z-1/2$  #2  $-x-1/2, y+1/2, z$  #3  $-x, y+1/2, -z-1/2$  #4  $-x, -y+1, -z-1$  #5  $-x-1/2, y-1/2, z$  #6  $-x, -y, -z-1$  #7  $x, -y+3/2, z+1/2$  #8  $-x, -y+1, -z$

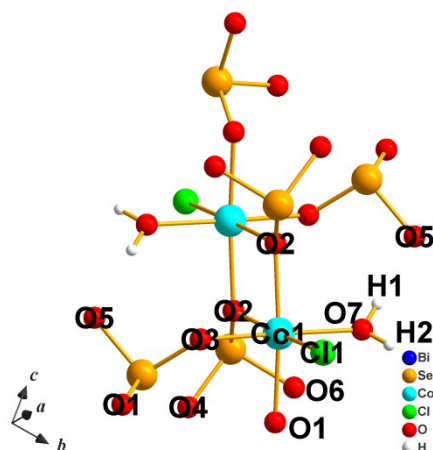

**Fig. S1** The structural geometry of hydrogen atoms for  $\text{CoBi}(\text{SeO}_3)_2(\text{H}_2\text{O})\text{Cl}$ .

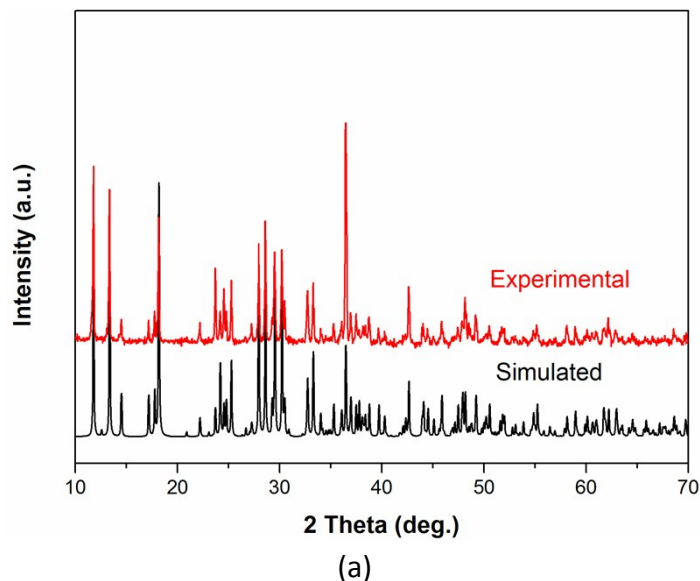

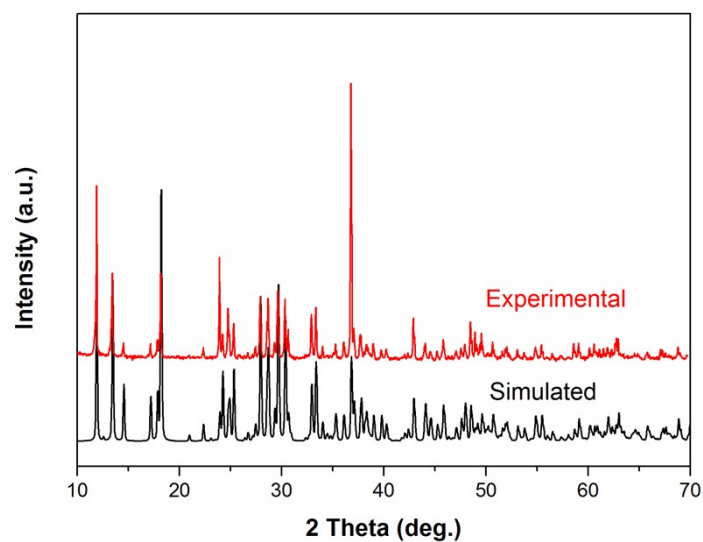

(b)

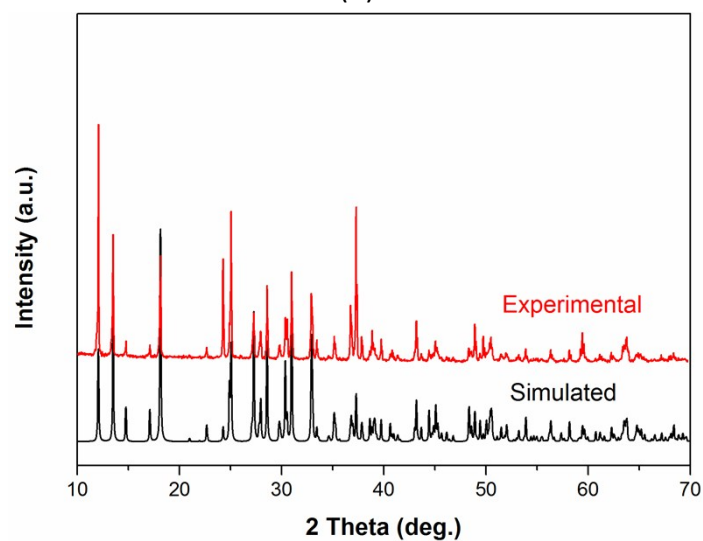

(c)

**Fig. S2** The experimental and simulated powder x-ray diffraction patterns for Co (a), Ni (b), and Cu (c), respectively ( $\lambda = 1.5406 \text{ \AA}$ ).

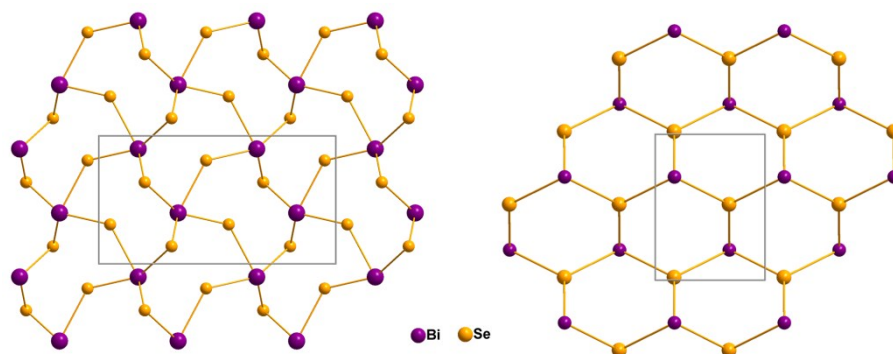

**Fig. S3** The comparison of 2D [Bi(SeO<sub>3</sub>)<sub>2</sub>]<sub>∞</sub> layer (left) in CoBi(SeO<sub>3</sub>)<sub>2</sub>(H<sub>2</sub>O)Cl with the 2D [BiSeO<sub>3</sub>]<sub>∞</sub> layer (right) in  $\gamma$ -BiSeO<sub>3</sub>Cl. Oxygen atoms are omitted for clarity.

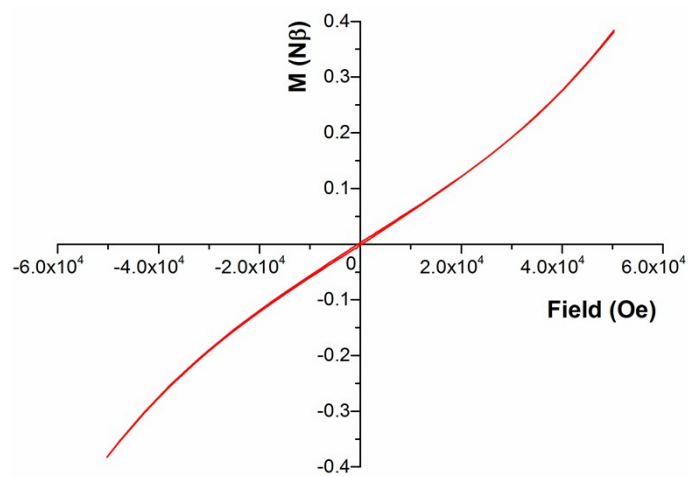

(a)

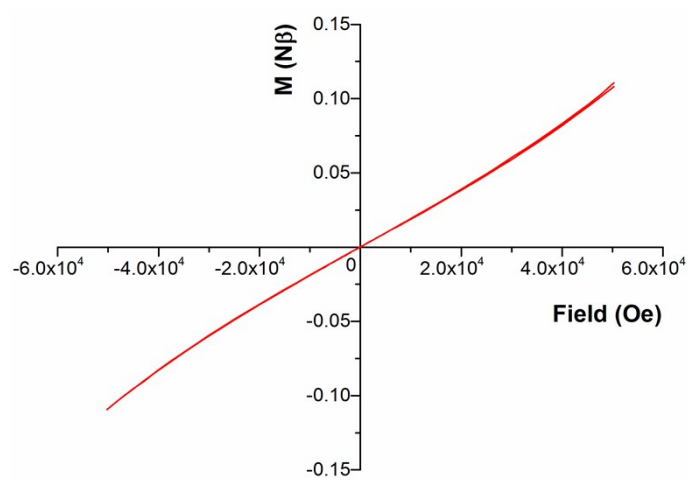

(b)

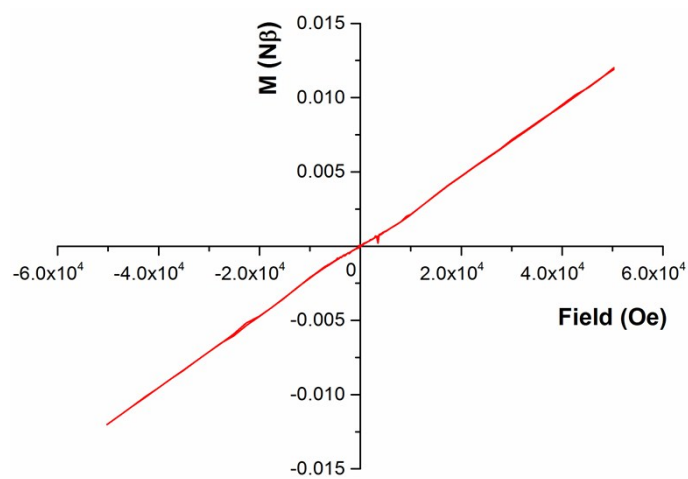

(c)

**Fig.S4** The magnetization vs. magnetizing field for compound  $\text{CoBi}(\text{SeO}_3)_2(\text{H}_2\text{O})\text{Cl}$  (a),  $\text{NiBi}(\text{SeO}_3)_2(\text{H}_2\text{O})\text{Cl}$  (b) and  $\text{CuBi}(\text{SeO}_3)_2(\text{H}_2\text{O})\text{Cl}$  (c).
